# Supplementary material for: Swiss National Registry on Catheter Ablation Procedures: Changing Trends over the Last 20 Years
Source: MDPI journal article supplement (doi:10.3390/jcm10143021), 2021-07-07
Supplement: s1 [file s1]

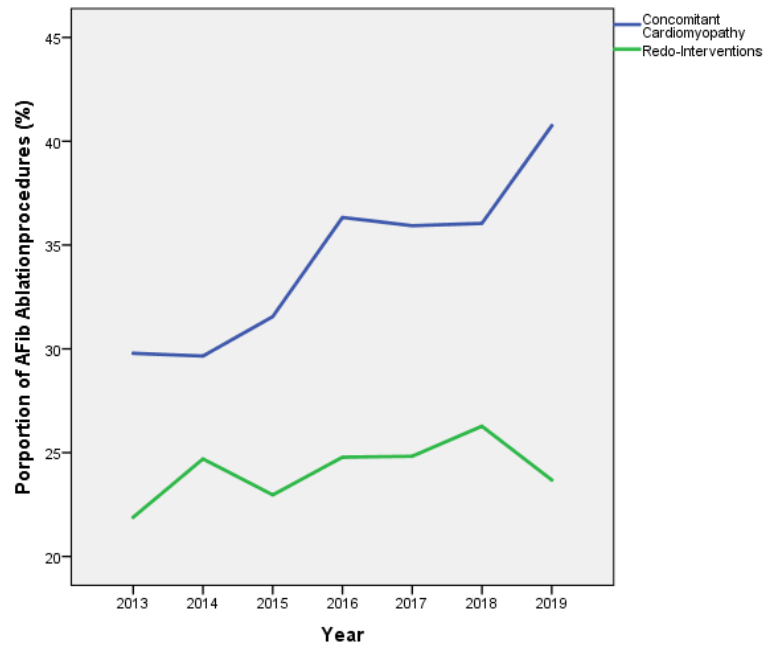

**Figure S1.** Repeat interventions and concomitant heart diseases in patients who underwent ablation for atrial fibrillation.

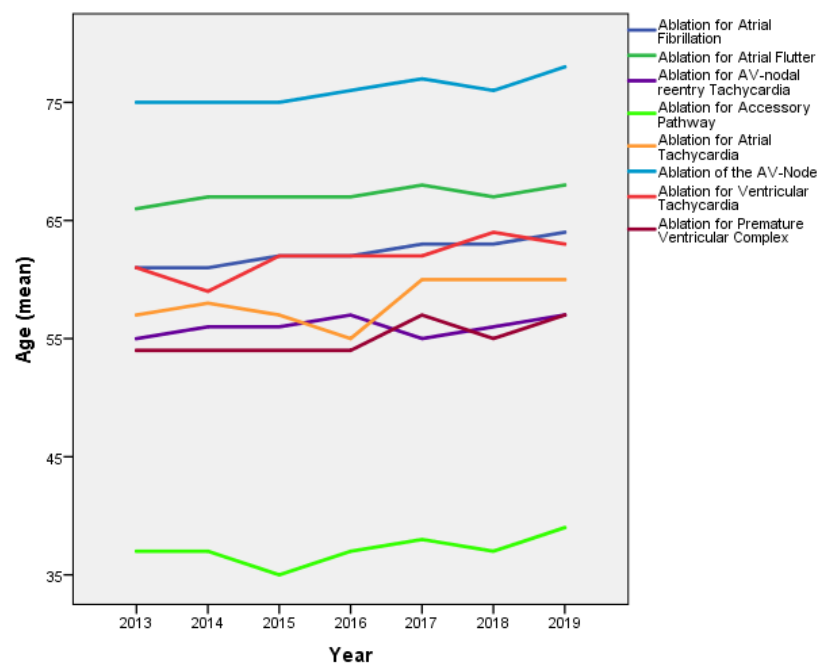

**Figure S2.** Age at ablation time distributed by type of ablation from 2013 till the end of 2019.

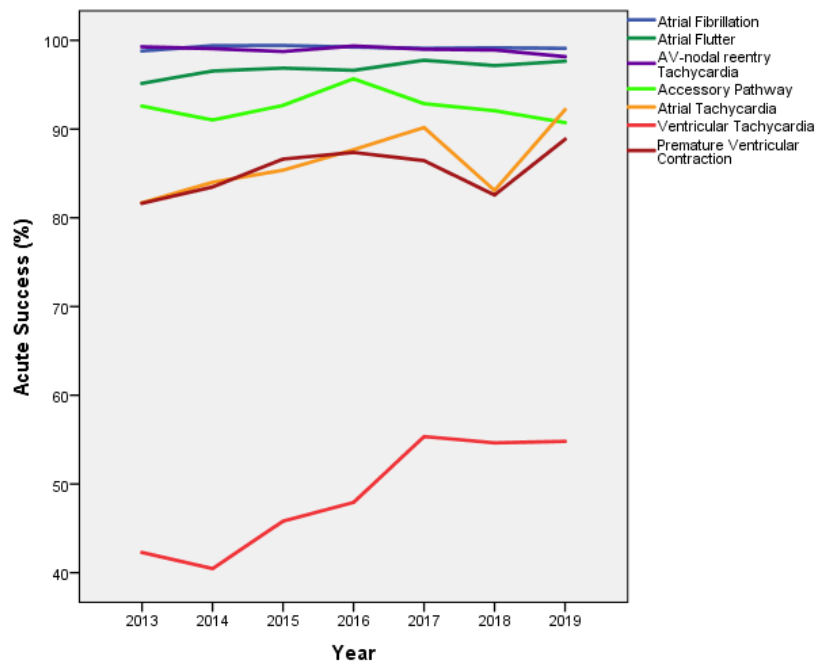

Figure S3. Acute success rates for different indications.
